# Supplementary material for: A heteropentanuclear oxalato-bridged [ReIV4GdIII] complex: synthesis, crystal structure and magnetic properties
Source: Royal Society of Chemistry journal article supplement (doi:10.1039/c2cc33350c), 2012-01-01
Supplement: c2cc33350c.pdf [file c2cc33350c.pdf]

## Electronic Supplementary Information (ESI)

### A heteropentanuclear oxalato-bridged $[\text{Re}^{\text{IV}}_4\text{Gd}^{\text{III}}]$ complex: synthesis, crystal structure and magnetic properties

José Martínez-Lillo,<sup>\*a</sup> Laura Cañadillas-Delgado,<sup>b</sup> Joan Cano,<sup>a,c</sup> Francesc Lloret,<sup>a</sup> Miguel Julve<sup>a</sup> and Juan Faus<sup>\*a</sup>

*a) Departament de Química Inorgànica/Instituto de Ciencia Molecular, Facultat de Química de la Universitat de València, Dr. Moliner 50, 46100, Burjassot, Valencia, Spain. E-mails: [juan.faus@uv.es](mailto:juan.faus@uv.es), [lillo@uv.es](mailto:lillo@uv.es)*

*b) Instituto de Ciencia de Materiales de Aragón. CSIC-Universidad de Zaragoza C/ Pedro Cerbuna 12 E-50009 Zaragoza, Spain / Institut Laue Langevin, 6 Rue Jules Horowitz, B.P. 156, 38042 Grenoble, Cedex 9, France. Current address: Centro Universitario de la Defensa. Academia General Militar. Ctra. Huesca s/n. 50090 Zaragoza, Spain.*

*c) Fundació General de la Universitat de València (FGUV), Universitat de València, Valencia, Spain.*

#### Preparation of compound 1.

All starting chemicals and solvents were purchased from commercial sources and used without further purification. The mononuclear precursor  $(\text{NBu}_4)_2[\text{ReBr}_4(\text{ox})]$  was prepared by following the procedure described for  $(\text{PPh}_4)_2[\text{ReBr}_4(\text{ox})]$  ( $\text{PPh}_4^+$  = tetraphenylphosphonium cation) by using  $\text{NBu}_4\text{Cl}$  instead of  $\text{PPh}_4\text{Cl}$  as the precipitating agent (*See Ref. 7c* from the main text). Compound **1** was prepared by pouring a solution of 107.9 mg (0.1 mmol) of  $(\text{NBu}_4)_2[\text{ReBr}_4(\text{ox})]$  in a 2-propanol/MeCN (4:1, v/v, 25 mL) mixture into another one formed by 8.6 mg (0.025 mmol) of  $\text{Gd}(\text{NO}_3)_3 \cdot 6\text{H}_2\text{O}$  in 2-propanol (10 mL).

The resulting green–yellowish solution was allowed to evaporate at room temperature. X-ray suitable yellow crystals of **1** were grown after three weeks. They were filtered off and washed with diethyl ether. Yield: *ca.* 43%. Found: C, 28.2; H, 4.8; N, 1.9. Calc. for  $\text{C}_{88}\text{H}_{184}\text{Br}_{16}\text{N}_5\text{O}_{18}\text{GdRe}_4$  (**1**): C, 28.0; H, 4.9; N, 1.9%. The 4:1 (Re:Gd) molar ratio in **1** was determined by X-ray microanalysis performed on a microcrystalline sample and by using a Philips XL-30 scanning electron microscope (SEM) equipped with an X-ray microanalysis system from the Central Service for the Support to Experimental Research (SCSIE) of the University of Valencia. IR (KBr pellet /  $\text{cm}^{-1}$ ): bands associated to the oxalato ligand appear at 1700sh, 1682s, 1667vs ( $\nu_{\text{asCO}}$ ) and 807s ( $\delta_{\text{OCO}}$ ). Compound **1** is soluble at room temperature in common organic solvents such as acetone, acetonitrile and *N,N'*-dimethylformamide.

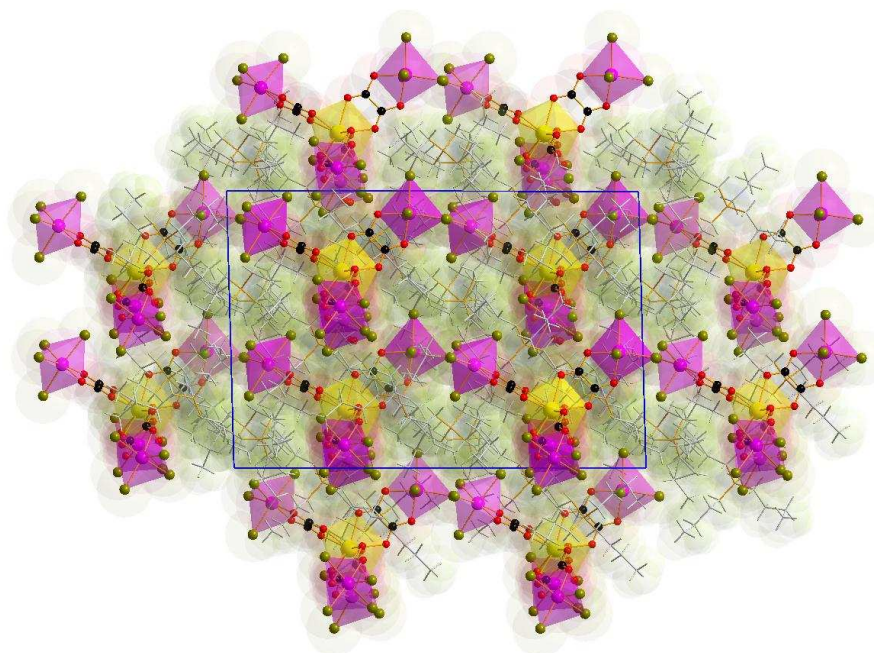

**Figure S1.** A view along the crystallographic *b* axis of the packing in **1** showing the arrangement of the  $[\text{Gd}\{\text{ReBr}_4(\mu\text{-ox})\}_4(\text{H}_2\text{O})]^{5-}$  anions (polyhedra) and  $\text{NBu}_4^+$  cations (sticks). Solvent  $\text{H}_2\text{O}$  molecules have been omitted for clarity.

**a)**

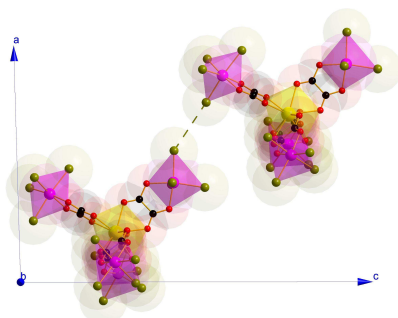

**b)**

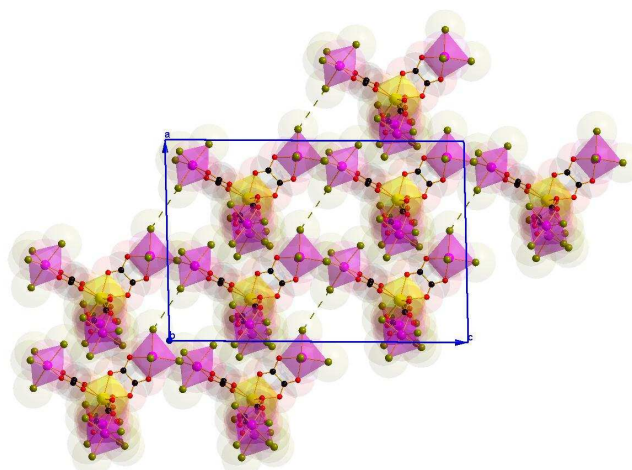

**Figure S2.** (a) Shortest intermolecular  $\text{Br}\cdots\text{Br}$  separation between pentanuclear  $[\text{Gd}\{\text{ReBr}_4(\mu\text{-ox})\}_4(\text{H}_2\text{O})]^{5-}$  units. (b) View of a fragment of packing in **1** showing the arrangement of three chains of anions through the shortest intermolecular  $\text{Br}\cdots\text{Br}$  interaction (dashed lines).

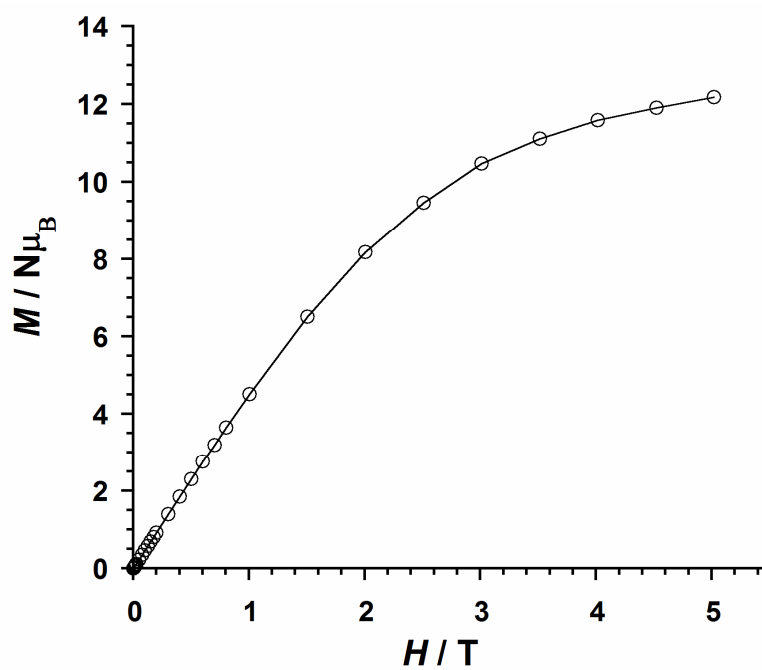

**Figure S3.** Field dependence of the magnetization at 2.0 K for **1** (the solid line is an eye guide).
